# Supplementary material for: Changes in Homogalacturonan Metabolism in Banana Peel during Fruit Development and Ripening
Source: MDPI journal article supplement (doi:10.3390/ijms23010243), 2021-12-27
Supplement: s1 [file s1]

## Supplementary data

# Changes in Homogalacturonan Metabolism in Banana Peel during Fruit Development and Ripening

Tong Ning <sup>1,†</sup>, Chengjie Chen <sup>1,†</sup>, Ganjun Yi <sup>2</sup>, Houbin Chen <sup>1,3</sup>, Yudi Liu <sup>1</sup>, Yanjie Fan <sup>1</sup>, Jing Liu <sup>1</sup>, Shule Chen <sup>1</sup>, Sixuan Wei <sup>1</sup>, Zexuan Li <sup>1</sup>, Yehuan Tan <sup>1</sup>, Zhenting He <sup>1</sup>, and Chunxiang Xu <sup>1,\*</sup>

†These authors contributed equally to this work.

\*Author for correspondence: Chunxiang Xu

College of Horticulture

South China Agricultural University

483, Wushan Rd.

Guangzhou, 510642

Guangdong Province, China

Email: chxxu@scau.edu.cn, 970575851@qq.com

**Table S1-2**

**Figure S1-2**

**Table S1.** Primer sequences used in the present study.

| Gene        | Forward primer (5'-3')  | Reverse primer (5'-3') |
|-------------|-------------------------|------------------------|
| Actin       | TGGTATGGAAGCCGCTGGTA    | TCTGCTGGAATGTGCTGAGG   |
| Ma09_g15970 | ACTCTGTTCCCTGCACCAAC    | GAGGTAAGCCCTCCGACAAG   |
| Ma07_g28300 | TCCTGAAGGGTGAATGACTG    | GCCATCAATGTATCCCCTGTC  |
| Ma11_g23340 | TTATTGACTTGGAGAAGTGGAG  | GTAATGCAATGATGTAGCAGTC |
| Ma08_g12630 | ACGGATGAAAGTGAGTGGAAG   | CGCATCAGAAGTGATGGAG    |
| Ma09_g12060 | ACGCAATCGAGTTCAACATAAC  | AGAGGCACTTGTTGTGGAAG   |
| Ma03_g00210 | TGCAAGCTTGTGGAAGAATTG   | TCAGAAGTCAATGTGCCAACC  |
| Ma04_g02960 | CCAGTTCACCTGGCGTGTAGC   | AAGCAGGTGATGGGAGGAATG  |
| Ma07_g15530 | CCTTGGACACACTGTACTACGC  | GGTCAACCCAGCTGTGTACTTC |
| Ma03_g05670 | GCAACGTGATAGTGAAGACC    | TCCCCATAATACAACGTGTC   |
| Ma02_g21670 | AACTCTACTCCAGGGTGGTG    | GAGGAGCCGTAGATGAACTG   |
| Ma11_g02770 | GAGGTCTGAAGAAGCCGATATG  | CCCAACACAATCCACAGGTAG  |
| Ma02_g16140 | CCAGTTCTACTGCGACCAGAG   | TAGCTAGCTCCACGTTGCTTC  |
| Ma05_g20750 | TGAGAGGCAGGACACATGG     | GACGATGTGATGGCAGGTG    |
| Ma06_g30000 | GCGAGTGGAAGAAGTGGAAC    | CCCTTCTTGACGAGAGAAAC   |
| Ma11_g19010 | GATCGAGCACCGATGGAATC    | AGAGGTTGTCGAGCGGACAC   |
| Ma07_g18890 | GGGTGCTCTGGAAACTTGG     | CCCGGACATAAGGATGGTC    |
| Ma08_g21130 | ACGGCATCACCATCAAGAAC    | CGGTGGAGCAGTATCCTGAG   |
| Ma01_g07260 | TTTTGGAGGACACAGGGTTC    | TGCACTTGTACTGCCCCGTAG  |
| Ma04_g33470 | ACCAGACGGCGTTCTTTGG     | AAGGATCGGAAGGGCCAAG    |
| Ma04_g28370 | GAAGAAAACAACCTCCAAGATGG | TGTGGGATATTCTAGTCCTTGC |
| Ma04_g23990 | GACATCCAGACGTGGGTGAG    | GCAGAGTTGAGCACGTTGATG  |
| Ma04_g20800 | ACCTCAGCAACGTCCAGACC    | CCGAGTTGATTCACGAGAGC   |
| Ma04_g31200 | GACATGCAGACGTGGGTGAG    | ATGACAAGGCGTTGCTCGTC   |

---

|             |                       |                       |
|-------------|-----------------------|-----------------------|
| Ma03_g13710 | AAGGGTGGACACAGATCAAAG | TCAGTGTGTCAACCAAGGAAG |
| Ma06_g24560 | AGCTTCTGGTGCTCAACCTC  | GCAGAGGCACTTGTTATGGAG |

---

**Table S2.** Antibody used in the present study and the antigens.

| Antibody  | Antigen                                                                                                                                                                                                  | Reference                                 |
|-----------|----------------------------------------------------------------------------------------------------------------------------------------------------------------------------------------------------------|-------------------------------------------|
| 2F4       | Un-esterified/Calcium ion cross-linked HG                                                                                                                                                                | [1]                                       |
| CCRC-M34  | Partially methyl-esterified HG<br>[base-sensitive homogalacturonan epitope]                                                                                                                              | [2]                                       |
| CCRC-M38  | Fully de-esterified HG<br>[de-esterified homogalacturonan (DP>5)]                                                                                                                                        | [2]                                       |
| CCRC-M130 | Methyl-esterified on HG                                                                                                                                                                                  | [2]                                       |
| JIM5      | Partially methy-esterified HG epitope: unesterified<br>and partially esterified residues (up to 40%)<br>[Me(alpha)GalA1->4(alpha)GalA1->4(alpha)GalA1->4<br>(alpha)GalA1->4(alpha)GalA1->4(alpha)MeGalA] | [3]                                       |
| JIM7      | Partially methy-esterified HG epitope:<br>methyl-esterified residues (up to 80%)<br>[GalA1->4MeGalA1->4MeGalA1->4MeGalA1->4MeG<br>alA1->4GalA]                                                           | [3,4]                                     |
| LM7       | Partially Me-HG / non-blockwise                                                                                                                                                                          | [3]                                       |
| LM18      | Lowly methyl-esterified HG / a trigalacturonide                                                                                                                                                          | [5]                                       |
| LM19      | De-esterified HG<br>not recognizing oligogalacturonides of DP<4                                                                                                                                          | [5]                                       |
| LM20      | Highly methyl-esterified HG<br>alpha-MeGalA(1-4)alpha-MeGalA(1-4)alpha-MeGalA<br>(1-4)alpha-MeGalA                                                                                                       | [5]                                       |
| PME       | Pectin methyl esterase in <i>Musa acuminata</i>                                                                                                                                                          | Generated by Abmart<br>(Shanghai, China). |

DP: degree of polymerization; HG: homogalacturonan; PME: pectin methyl esterase

## References

1. Liners F.; Letesson, J.J.; Didembourg, C.; Van-Cutsem, P. Monoclonal Antibodies against Pectin: Recognition of a Conformation Induced by Calcium. *Plant Physiol.* **1989**, *91*, 1419–1424, doi:10.1104/pp.91.4.1419.
2. Pattathil, S.; Avci, U.; Baldwin, D.; Swennes, A.G.; McGill, J.A.; Popper, Z.; Bootten, T.; Albert, A.; Davis, R.H.; Chennareddy, C.; et al. A Comprehensive Toolkit of Plant Cell Wall Glycan-directed Monoclonal Antibodies. **2010**, *153*, 514–525, doi:10.1104/pp.109.151985.
3. Clausen, M.H.; Willats, W.G.T.; Knox, J.P. Synthetic Methyl Hexagalacturonate Hapten Inhibitors of Antihomogalacturonan Monoclonal Antibodies LM7, JIM5 and JIM7. *Carbohydr Res.* **2003**, *338*, 1797–1800, doi:10.1016/S0008-6215(03)00272-6.
4. Knox, J.P.; Linstead, P.J.; King, J.; Cooper, C.; Roberts, K.; Pectin Esterification is Spatially Regulated both within Cell Walls and between Developing Tissues of Root Apices. *Planta* **1990**, *181*, 512–521, doi:10.1007/BF00193004.
5. Verhertbruggen, Y.; Marcus, S.E.; Haeger, A.; Ordaz-Ortiz, J.J.; Knox, J.P. An Extended Set of Monoclonal Antibodies to Pectic Homogalacturonan. *Carbohydr. Res.* **2009**, *344*, 1858–1862, doi:10.1016/j.carres.2008.11.010.

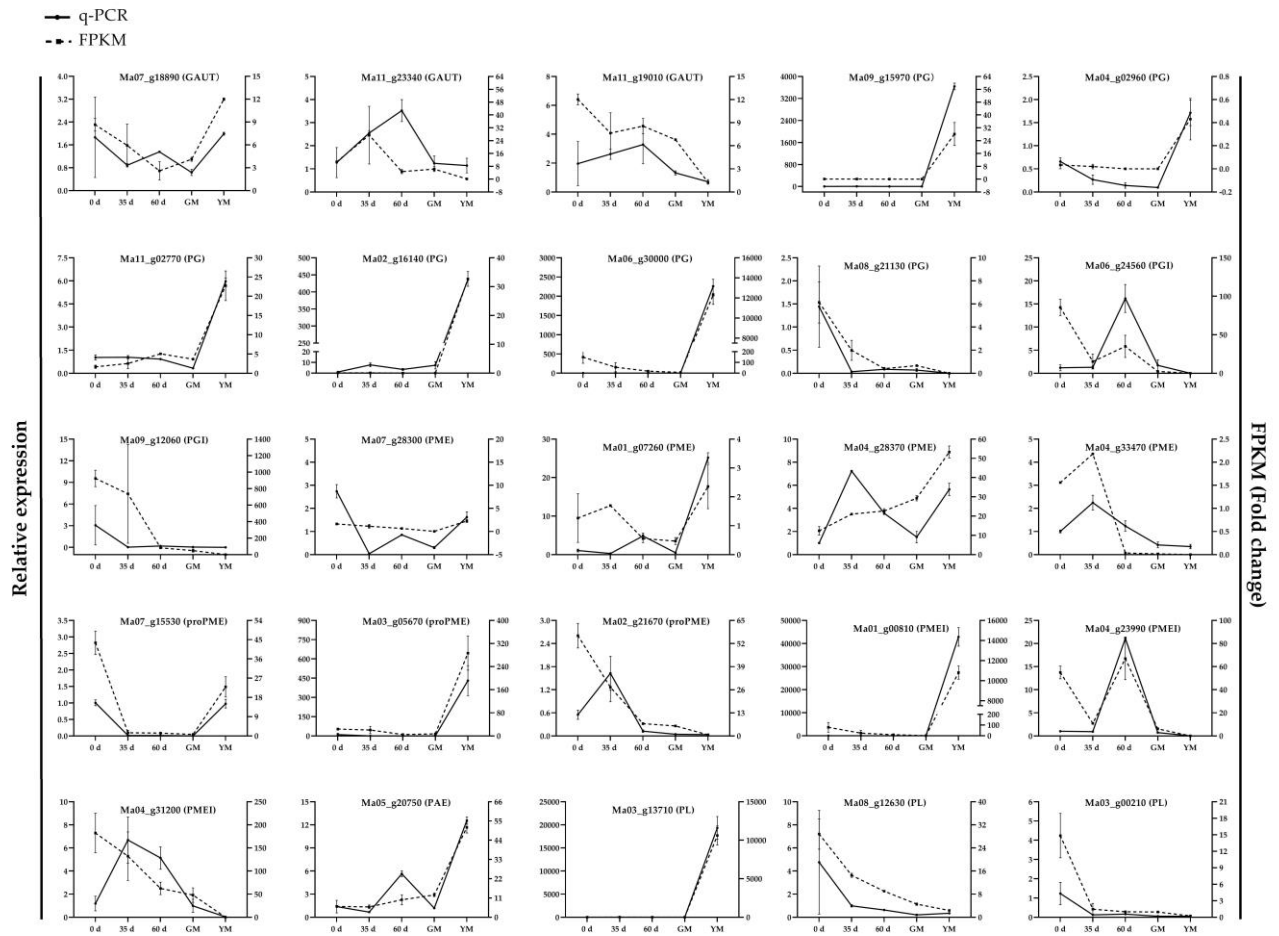

**Figure S1.** qPCR analysis of the expression of 25 representative differentially expressed homogalacturonan-modifying genes in banana (*Musa* spp. AAA) peel during fruit development and ripening.

0 d: fruits just emerging from the bunch; 35 d: 35 day-old fruits; 60 d: 60 day-old fruits; GM: green matured fruits (at harvest, 85 d); YM: yellow matured fruits (6 d after ethylene treatment).

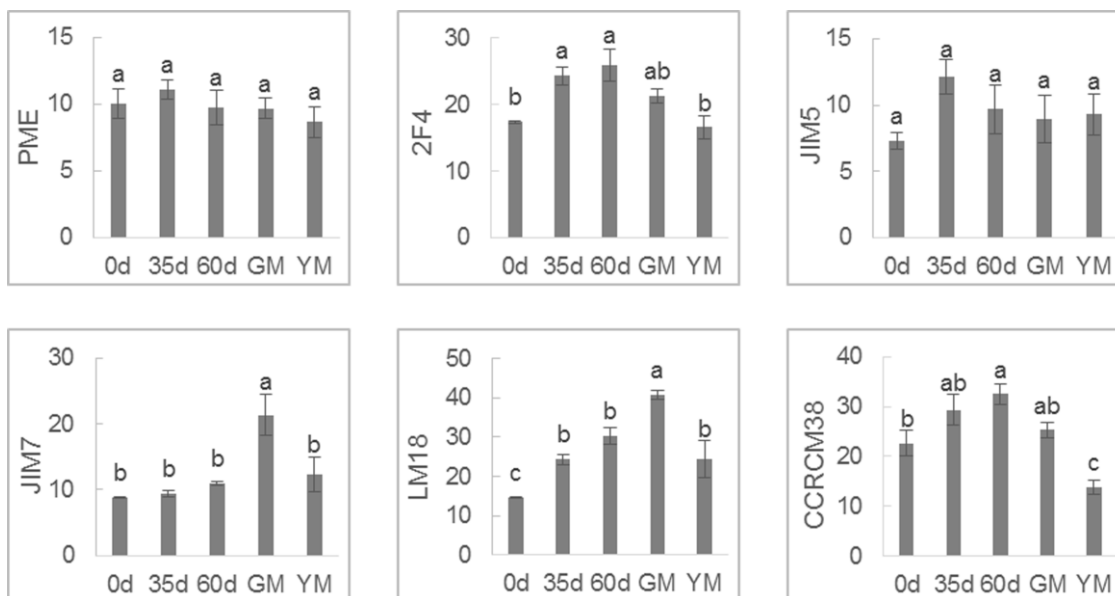

**Figure S2.** The quantification of fluorescence intensity of antibodies recognizing PME and different homogalacturonan components in banana (*Musa* spp. AAA) peel during fruit development and ripening.

0 d: fruits just emerging from the bunch; 35 d: 35 day-old fruits; 60 d: 60 day-old fruits; GM: green matured fruits (at harvest, 85 d); YM: yellow matured fruits (6 d after ethylene treatment).
